# Supplementary material for: Chronic Thermogenic Dietary Supplement Consumption: Effects on Body Composition, Anthropometrics, and Metabolism
Source: Nutrients. 2023 Nov 17;15(22):4806. doi: 10.3390/nu15224806 (PMC10674526; doi:10.3390/nu15224806)
Supplement: Supplementary file 1 [file nutrients-15-04806-s001.zip › Table S1.xlsx]

## Sheet: Female Participants (n=26)
	CON (n=7)		PRO (n=9)		PRO+FB (n=10)
Variable	Mean	SD	Mean	SD	Mean	SD
Height (cm)	164.7	6.986	163.778	9.668	165.53	4.583
Body mass (kg)	68.197	10.262	67.702	17.411	66.648	8.836
Body fat percentage	32.829	6.352	32.422	6.464	31.88	7.571
Age (years)	22	2.449	23.222	3.27	22.2	2.7
Caffeine intake (mg per day)	159.286	27.603	148.333	52.915	134.5	58.663
Training age (years)	8	5.568	6.556	4.275	10.25	5.624
Training frequency (days per week)	4.571	1.539	4.278	0.712	4.35	1.473
Physical activity (MET-min per week)	3958.57	3015.28	4140.56	3408.67	3878.7	2122.21
Physical activity energy expenditure (kcal per day)	694.02	610.194	788.619	921.799	622.057	293.902
Energy intake (kcal per day)	1832.79	580.971	1633.99	276.427	1834.88	576.916
Protein intake (g per day)	93.047	37.793	82.559	25.898	86.141	40.589
Fat intake (g per day)	70.271	37.65	70.725	19.269	70.413	20.966
Carbohydrate intake (g per day)	206.655	52.036	168.798	69.091	218.434	86.305
MFQ score	6.571	4.541	7.444	7.091	10.1	12.041
PSQI score	4.714	1.799	4.444	2.128	5.1	2.234
TFEQ cognitive restraint score	13	2.582	11.778	4.147	14.6	3.864
TFEQ uncontrolled eating score	17.286	5.407	17.444	5.341	17.2	4.104
TFEQ emotional eating score	5.714	2.563	5.111	1.965	5.1	2.378

## Sheet: Male Participants (n=26)
	CON (n=6)		PRO (n=11)		PRO+FB (n=9)
Variable	Mean	SD	Mean	SD	Mean	SD
Height (cm)	171.483	8.191	177.836	6.635	176.756	7.67
Body mass (kg)	87.876	6.665	84.286	8.425	83.782	8.811
Body fat percentage	23.417	4.183	20.755	6.538	23.189	5.989
Age (years)	24.333	1.211	24.364	3.472	25	2.784
Caffeine intake (mg per day)	169.167	67.41	135.909	56.516	133.333	52.142
Training age (years)	8.833	4.215	7.682	5.169	6.444	4.216
Training frequency (days per week)	4.75	0.524	5	1.549	4.167	1.346
Physical activity (MET-min per week)	4591.5	2112.24	4805.64	2518.6	3501.56	1938.22
Physical activity energy expenditure (kcal per day)	985.238	375.857	1025	588.015	739.587	412.793
Energy intake (kcal per day)	2213.16	942.919	2716.09	1031.68	2765.76	927.655
Protein intake (g per day)	134.119	82.903	169.823	73.797	146.273	45.593
Fat intake (g per day)	93.52	48.842	108.039	66.766	123.299	50.642
Carbohydrate intake (g per day)	207.06	70.067	271.653	79.876	270.221	106.028
MFQ score	5.667	3.882	5.727	4.197	3.222	3.701
PSQI score	5.5	1.643	4.818	2.272	4.778	3.032
TFEQ cognitive restraint score	14.167	1.472	12.273	3.379	12.333	3
TFEQ uncontrolled eating score	19	5.797	17.727	5.002	17.667	5.148
TFEQ emotional eating score	5.5	2.588	4.273	1.272	3.778	1.641
