# Supplementary material for: Chronic Thermogenic Dietary Supplement Consumption: Effects on Body Composition, Anthropometrics, and Metabolism
Source: Nutrients. 2023 Nov 17;15(22):4806. doi: 10.3390/nu15224806 (PMC10674526; doi:10.3390/nu15224806)
Supplement: Supplementary file 1 [file nutrients-15-04806-s001.zip › Table S2.xlsx]

## Sheet: Body Mass
$`repeated measures anova with sex`
ANOVA Table (type III tests)
	Effect	DFn	DFd	F	p	p<.05	ges
1	Group	2	46	0.217	0.805		0.009
2	Sex	1	46	33.98	5.22e-07	*	0.424
3	Time	1	46	4.125	0.048	*	0.000297
4	Group:Sex	2	46	0.071	0.931		0.003
5	Group:Time	2	46	1.041	0.361		0.00015
6	Sex:Time	1	46	0.131	0.719		9.44e-06
7	Group:Sex:Time	2	46	0.382	0.685		5.5e-05
DFn: degrees of freedom in the numerator (i.e., DF effect)
DFd: degrees of freedom in the denominator (i.e., DF error)
F: F-value
p: p-value
ges: generalized eta-squared effect size

## Sheet: BFP (total)
$`repeated measures anova with sex`
ANOVA Table (type III tests)
	Effect	DFn	DFd	F	p	p<.05	ges
1	Group	2	46	0.349	0.707		0.015
2	Sex	1	46	29.273	2.19e-06	*	0.387
3	Time	1	46	2.363	0.131		0.000372
4	Group:Sex	2	46	0.201	0.819		0.009
5	Group:Time	2	46	1.578	0.217		0.000497
6	Sex:Time	1	46	0.305	0.583		4.8e-05
7	Group:Sex:Time	2	46	1.362	0.266		0.000429
DFn: degrees of freedom in the numerator (i.e., DF effect)
DFd: degrees of freedom in the denominator (i.e., DF error)
F: F-value
p: p-value
ges: generalized eta-squared effect size

## Sheet: BFP (arms)
$`repeated measures anova with sex`
ANOVA Table (type III tests)
	Effect	DFn	DFd	F	p	p<.05	ges
1	Group	2	46	0.56	0.575		0.024
2	Sex	1	46	60.328	6.53e-10	*	0.566
3	Time	1	46	2.385	0.129		0.000372
4	Group:Sex	2	46	0.272	0.763		0.012
5	Group:Time	2	46	0.496	0.612		0.000155
6	Sex:Time	1	46	0.294	0.59		4.6e-05
7	Group:Sex:Time	2	46	3.122	0.054		0.000974
DFn: degrees of freedom in the numerator (i.e., DF effect)
DFd: degrees of freedom in the denominator (i.e., DF error)
F: F-value
p: p-value
ges: generalized eta-squared effect size

## Sheet: BFP (legs)
$`repeated measures anova with sex`
ANOVA Table (type III tests)
	Effect	DFn	DFd	F	p	p<.05	ges
1	Group	2	46	0.554	0.579		0.023
2	Sex	1	46	61.686	4.86e-10	*	0.571
3	Time	1	46	1.766	0.19		0.000265
4	Group:Sex	2	46	0.053	0.949		0.002
5	Group:Time	2	46	0.994	0.378		0.000299
6	Sex:Time	1	46	0.883	0.352		0.000133
7	Group:Sex:Time	2	46	1.131	0.332		0.000339
DFn: degrees of freedom in the numerator (i.e., DF effect)
DFd: degrees of freedom in the denominator (i.e., DF error)
F: F-value
p: p-value
ges: generalized eta-squared effect size

## Sheet: BFP (trunk)
$`repeated measures anova with sex`
ANOVA Table (type III tests)
	Effect	DFn	DFd	F	p	p<.05	ges
1	Group	2	46	0.182	0.834		0.008
2	Sex	1	46	10.662	0.002	*	0.187
3	Time	1	46	1.602	0.212		0.000345
4	Group:Sex	2	46	0.299	0.743		0.013
5	Group:Time	2	46	2.188	0.124		0.000942
6	Sex:Time	1	46	0.048	0.828		1.03e-05
7	Group:Sex:Time	2	46	0.864	0.428		0.000372
DFn: degrees of freedom in the numerator (i.e., DF effect)
DFd: degrees of freedom in the denominator (i.e., DF error)
F: F-value
p: p-value
ges: generalized eta-squared effect size

## Sheet: FM (total)
$`repeated measures anova with sex`
ANOVA Table (type III tests)
	Effect	DFn	DFd	F	p	p<.05	ges
1	Group	2	46	0.241	0.787		0.01
2	Sex	1	46	2.311	0.135		0.048
3	Time	1	46	3.683	0.061		0.000367
4	Group:Sex	2	46	0.235	0.792		0.01
5	Group:Time	2	46	0.786	0.462		0.000157
6	Sex:Time	1	46	0.222	0.64		2.21e-05
7	Group:Sex:Time	2	46	1.181	0.316		0.000235
DFn: degrees of freedom in the numerator (i.e., DF effect)
DFd: degrees of freedom in the denominator (i.e., DF error)
F: F-value
p: p-value
ges: generalized eta-squared effect size

## Sheet: FM (arms)
$`repeated measures anova with sex`
ANOVA Table (type III tests)
Effect	DFn	DFd	F	p	p<.05	ges
Group	2	46	0.409	0.667		0.017
Sex	1	46	5.433	0.024	*	0.105
Time	1	46	2.286	0.137		0.000322
Group:Sex	2	46	0.268	0.766		0.011
Group:Time	2	46	1.267	0.291		0.000357
Sex:Time	1	46	0.004	0.952		5.27e-07
Group:Sex:Time	2	46	5.409	0.008	*	0.002
follow-up indicated that the three-way interaction was due to sex differences in FM (arms) at baseline and 4 weeks, without involvement of group.
Time	Effect	DFn	DFd	F	p	`p<.05`	ges
0	Sex	1	46	5.51	0.023	*	0.107
0	Group	2	46	0.363	0.698		0.016
0	Sex:Group	2	46	0.44	0.647		0.019
4	Sex	1	46	5.29	0.026	*	0.103
4	Group	2	46	0.465	0.631		0.02
4	Sex:Group	2	46	0.166	0.847		0.007
follow-up indicated significantly higher FM arms in females as compared to males at both time points
Time	.y.	group1	group2	n1	n2	p	p.signif
0	FM.arms	F	M	26	26	0.013	*
4	FM.arms	F	M	26	26	0.0173	*
Time	Sex	variable	n	mean	sd
0	F	FM.arms	26	2.23	0.956
0	M	FM.arms	26	1.66	0.572
4	F	FM.arms	26	2.19	0.969
4	M	FM.arms	26	1.64	0.577
DFn: degrees of freedom in the numerator (i.e., DF effect)
DFd: degrees of freedom in the denominator (i.e., DF error)
F: F-value
p: p-value
ges: generalized eta-squared effect size

## Sheet: FM (legs)
$`repeated measures anova with sex`
ANOVA Table (type III tests)
	Effect	DFn	DFd	F	p	p<.05	ges
1	Group	2	46	0.386	0.682		0.016
2	Sex	1	46	8.586	0.005	*	0.157
3	Time	1	46	3.848	0.056		0.000337
4	Group:Sex	2	46	0.014	0.986		0.000624
5	Group:Time	2	46	0.033	0.967		5.83e-06
6	Sex:Time	1	46	0.4	0.53		3.5e-05
7	Group:Sex:Time	2	46	0.754	0.476		0.000132
DFn: degrees of freedom in the numerator (i.e., DF effect)
DFd: degrees of freedom in the denominator (i.e., DF error)
F: F-value
p: p-value
ges: generalized eta-squared effect size

## Sheet: FM (trunk)
$`repeated measures anova with sex`
ANOVA Table (type III tests)
	Effect	DFn	DFd	F	p	p<.05	ges
1	Group	2	46	0.112	0.894		0.005
2	Sex	1	46	0.252	0.618		0.005
3	Time	1	46	2.545	0.118		0.000346
4	Group:Sex	2	46	0.487	0.618		0.021
5	Group:Time	2	46	1.002	0.375		0.000272
6	Sex:Time	1	46	0.179	0.674		2.43e-05
7	Group:Sex:Time	2	46	0.692	0.506		0.000188
DFn: degrees of freedom in the numerator (i.e., DF effect)
DFd: degrees of freedom in the denominator (i.e., DF error)
F: F-value
p: p-value
ges: generalized eta-squared effect size

## Sheet: VAT mass
$`repeated measures anova with sex`
ANOVA Table (type III tests)
	Effect	DFn	DFd	F	p	p<.05	ges
1	Group	2	46	0.037	0.964		0.002
2	Sex	1	46	4.332	0.043	*	0.085
3	Time	1	46	1.387	0.245		0.00057
4	Group:Sex	2	46	0.332	0.719		0.014
5	Group:Time	2	46	1.253	0.295		0.001
6	Sex:Time	1	46	0.102	0.751		4.2e-05
7	Group:Sex:Time	2	46	1.307	0.28		0.001
DFn: degrees of freedom in the numerator (i.e., DF effect)
DFd: degrees of freedom in the denominator (i.e., DF error)
F: F-value
p: p-value
ges: generalized eta-squared effect size

[truncated: 12 more sheets: LST (total), LST (arms), LST (legs), LST (trunk), SCF, WC, WHR, REE, RQ, HR, SBP, DBP]
